# Supplementary material for: A draft chromosome-scale genome assembly of a commercial sugarcane
Source: PubMed Central journal article supplement (PMC9705387; doi:10.1038/s41598-022-24823-0), 2022-11-28
Supplement: 41598_2022_24823_MOESM4_ESM.pdf [file 41598_2022_24823_MOESM4_ESM.pdf]

Inter-genomic comparison: KK3Sspont vs Sb (15871 gene pairs)

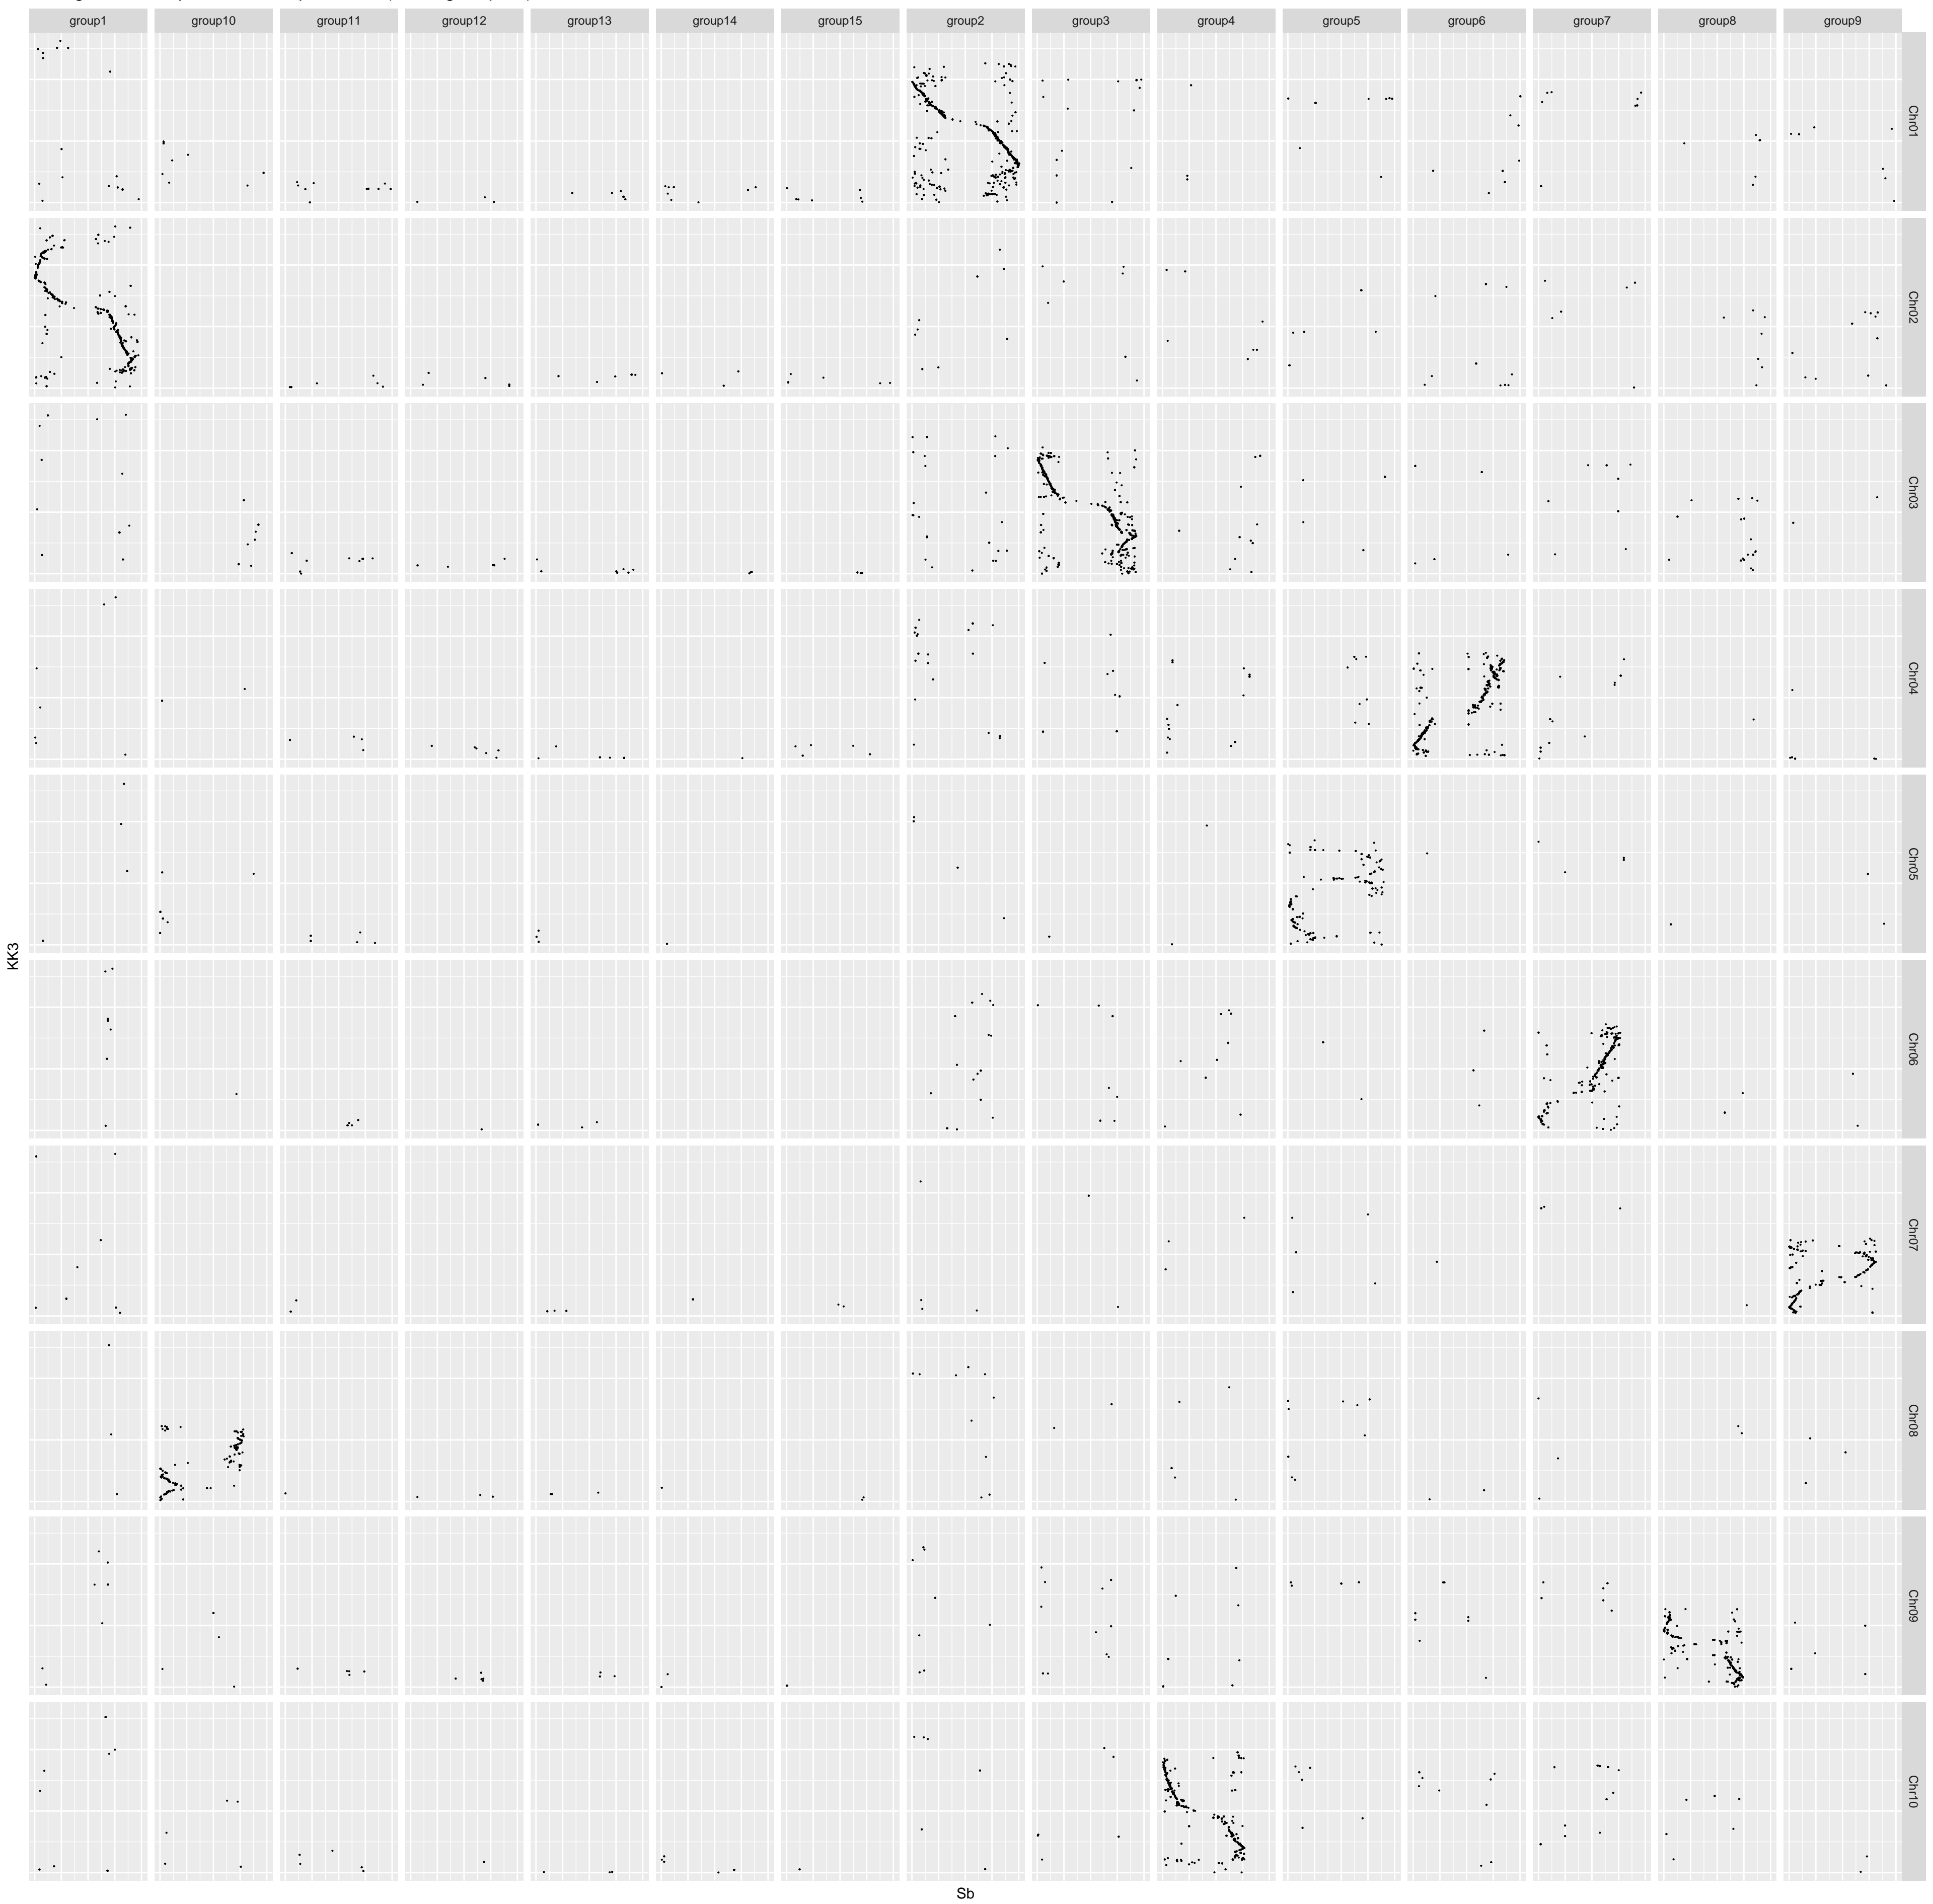

Sb
